# Supplementary material for: Enhancement of the Replication of Hepatitis C Virus Replicons of Genotypes 1 to 4 by Manipulation of CpG and UpA Dinucleotide Frequencies and Use of Cell Lines Expressing SECL14L2 for Antiviral Resistance Testing
Source: PubMed Central journal article supplement (PMC4862521; doi:10.1128/aac.02932-15), 2016-04-22
Supplement: AAC.02932-15_zac005165151so1.pdf [file AAC.02932-15_zac005165151so1.pdf]

## Supplementary Data

Sequence of the CpG/UpA-minimised luciferase gene (I):

>Luc\_CGUAL

GGCGCGCCATGGAAGATGCCAAAAACATCAAGAAAGGCCAGCCCCATTCTATCCTCTGG  
AGGATGGAACAGCTGGAGAGCAACTGCACAAGGCCATGAAGAGATATGCCCTGGTTCCTG  
GAACAATTGCTTTCACAGATGCACACATAGAGGTGAACATCACATATGCTGAATACTTTG  
AAATGTCTGTGTCAGGTTGGCAGAAGCCATGAAAAGATATGGGCTGAACACAAATCACAGAA  
TTGTTGTGTGCAGTGAAAACCTCTTCAATTCTTCATGCCTGTGTTGGGGGCTTTGTTCA  
TTGGAGTTGCAGTTGCTCCTGCTAATGACATTTACAATGAAAGAGAATTGCTCAACAGCA  
TGAACATTTCCCAGCCACAGTGGTGTGTTTGTTCAAAAAGGGGTTGCAAAAAATTTTGA  
ATGTGCAAAAAAATTGCCAATCATCCAGAAAATCATCATCATGGATTCCAAAACCTGATT  
ACCAGGGATTTTCAGTCCATGTACACATTTGTCACATCTCATCTGCCTCCTGGTTTTCAATG  
AATATGATTTTGTGCCAGAGTCCTTTGACAGAGACAAAACAATTGCACTGATCATGAACT  
CCTCTGGATCCACTGGGTTGCCCAAGGGTGTGGCCCTTCCCCACAGAAGTGCCTGTGTCA  
GATTCTCACATGCCAGAGATCCCATTTTTGGCAATCAAATCATTCCAGACACTGCCATTT  
TGAGTGTGTTCCATTCCATCATGGTTTTGGAATGTTCAACCACTTGGATATTTGATCT  
GTGGATTACAGAGTTGTCTTGATGTACAGATTTGAAGAAGAGCTGTTTTTGAGATCCCTTC  
AGGATTACAAAATTCAAAGTGCCTTGCTGGTTCCAACCCTTTTTTCATTCTTTGCCAAAA  
GCACTCTGATTGACAAATATGATTTGTCAAATTTGCATGAAATTGCTTCTGGGGGGGCAC  
CTCTTTCAAAGAAGTGGGGGAAGCAGTTGCAAAAAGATTCCATCTTCCAGGGATCAGAC  
AAGGATATGGGCTCACTGAGACAACATCAGCCATTCTGATCACACCTGAGGGGGATGACA  
AACCAGGTGCAGTGGGGAAAGTTGTTCCATTTTTTGAAGCCAAGGTTGTGGATCTGGACA  
CTGGGAAAACCTCTGGGGGTGAATCAGAGAGGGGAATTGTGTGTCAGAGGACCCATGATCA  
TGTCAGGTTATGTCAACAATCCAGAAGCAACCAATGCCTTGATTGACAAGGATGGATGGC  
TGCATTCTGGAGACATTGCTTACTGGGATGAAGATGAACACTTCTTCATTGTTGACAGAT  
TGAAGTCTTTGATCAAATACAAAGGATACCAGGTGGCCCCTGCTGAATTGGAGTCCATTT  
TGTTGCAACACCCCAACATCTTTGATGCAGGGGTGGCAGGTCTTCTGATGATGATGCTG  
GTGAACTTCCAGCTGCAGTTGTTGTTTTGGAGCATGGAAAGACAATGACTGAAAAAGAGA  
TAGTGGATTATGTTGCCAGTCAAGTGACAACCTGCCAAAAAGTTGAGGGGAGGAGTTGTGT  
TTGTGGATGAAGTTCCAAAAGGTCTGACTGGAAAACCTGGATGCAAGAAAAATCAGAGAGA  
TCCTCATCAAGGCCAAGAAGGGGGGAAAGTCCAAATTGTAAGTTTAAAC

Unique restriction sites at the 5' end (*AscI*) and 3' end (*PmeI*) underlined.

Fig. S1

Expression of luciferase at early time points post-transfection from  
Replication competent and defective genotype 2a replicons

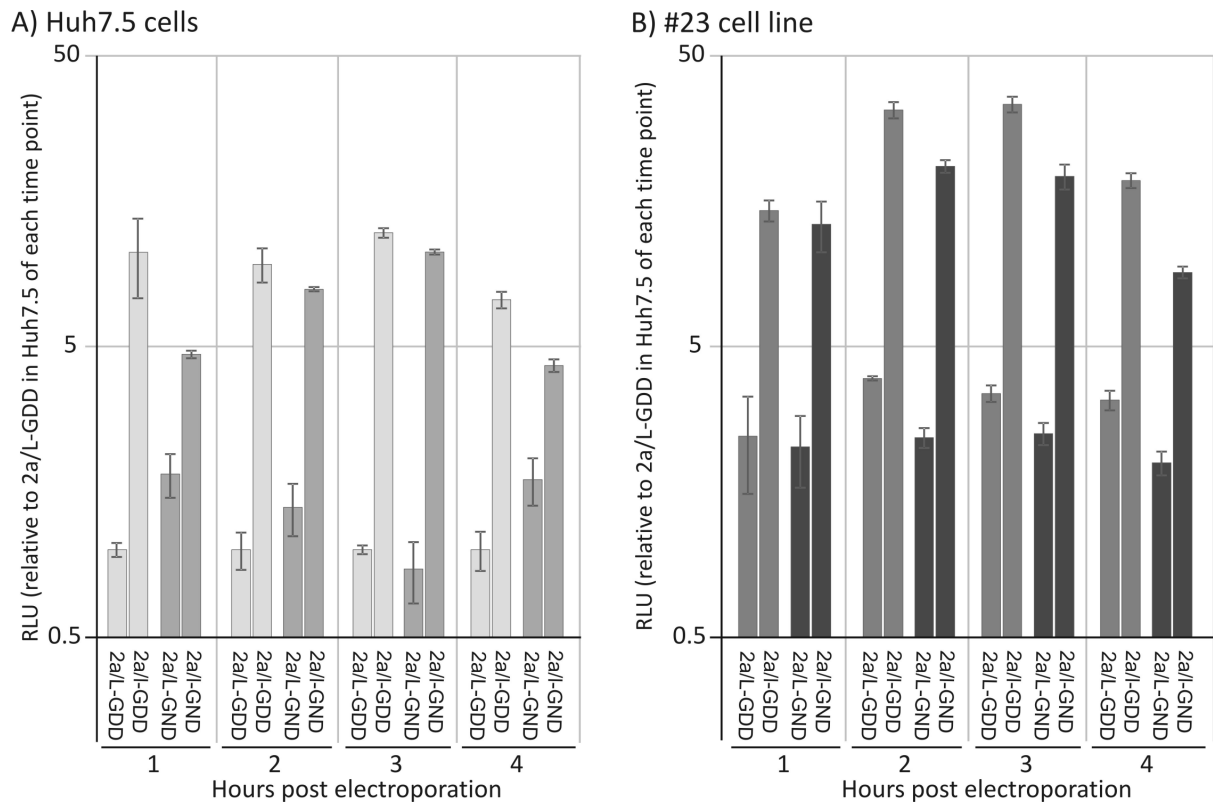

Luciferase expression in (A) Huh7.5 cells and (B) #23 cells after electroporation of genotype 2a replicons with WT and CpG/UpA-minimised luciferase gene sequences; y-axis scale is normalised to luciferase expression by 2a/L-GDD. Error bars depict SEMs.

Fig. S2

Effect of replicon RNA amount on luciferase detection

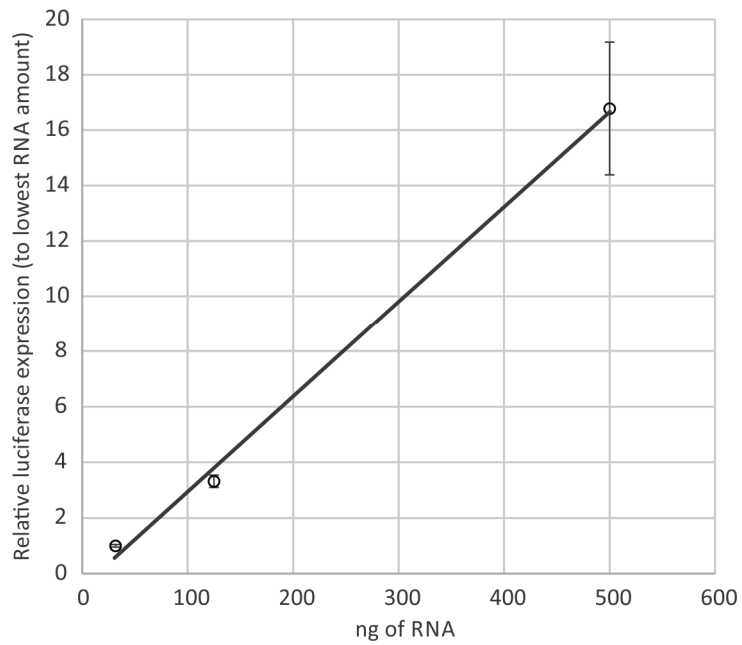

Translation of 1b/L-GND using 4 times less and 4 times more than the amount used in the comparison of different replicons (Figure 6) in a rabbit reticulocyte assay. Luciferase expression was measured after a 30 minute incubation time. Shown are the average of two replicates for each replicon; error bars show standard deviations.

FIGURE S3

Stability of HCV replicon RNA post transfection

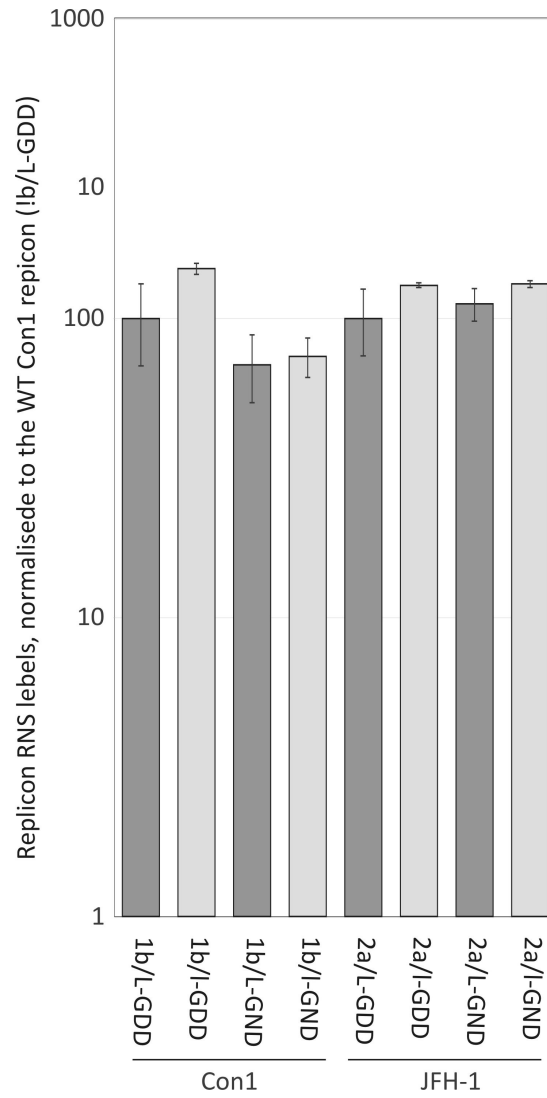

Quantitative PCR for HCV RNA at hours post-transfection for genotype 1b (Con1) and 2a (JFH-1) replicons. Values have been normalised to the RNA level of the Con1 WT replicon (1.0; y-axis). Error bars show standard deviations
